# Supplementary material for: Mechanistic insights into ortho-blocked and ortho-free vitrimeric polybenzoxazines incorporating dynamic Schiff linkages for closed-loop recyclability
Source: Royal Society of Chemistry journal article supplement (doi:10.1039/d4py00776j), 2024-01-01
Supplement: d4py00776j1.pdf [file d4py00776j1.pdf]

# Mechanistic insights into ortho-blocked and ortho-free vitrimeric polybenzoxazines incorporating dynamic Schiff linkages for closed-loop recyclability

Gaurav Rai, Leena Nebhani\*

Department of Materials Science and Engineering, Indian Institute of Technology Delhi  
Hauz Khas, New Delhi – 110016

\*Corresponding author: [Leena.Nebhani@mse.iitd.ac.in](mailto:Leena.Nebhani@mse.iitd.ac.in)

## Supporting Information

**Figure S1.**  $^1\text{H}$  NMR of BASA.

**Figure S2.** DSC of BASA and PBASA.

**Table S1.** Estimation of activation energy ( $E_a$ ) for the benzoxazine curing using the Ozawa method.

**Table S2.** Calculation of activation energy ( $E_a$ ) using stress relaxation studies.

**S3.** Calculation of crosslink density.

**Figure S3.** Swelling studies in different solvents (A) PVBI, and (B) PHBI

**Table S3.** Swelling ratio in different solvents kept for 7 days

**Figure S4.** Contact angle analysis performed on PVBI and PHBI

**Figure S5.** FTIR of Pristine and Recycled PVBI

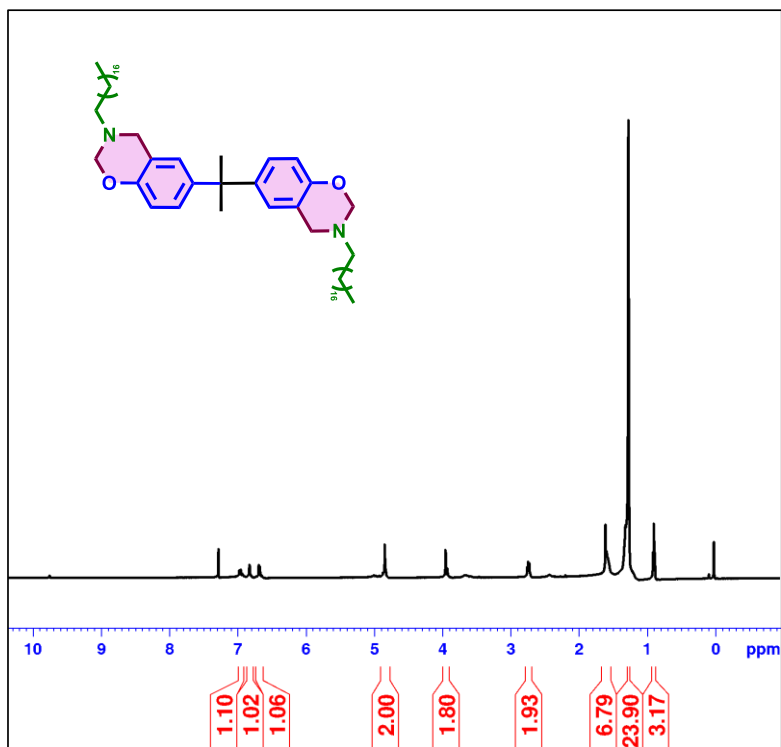

Figure S1. <sup>1</sup>H NMR spectra of control Sample – BASA.

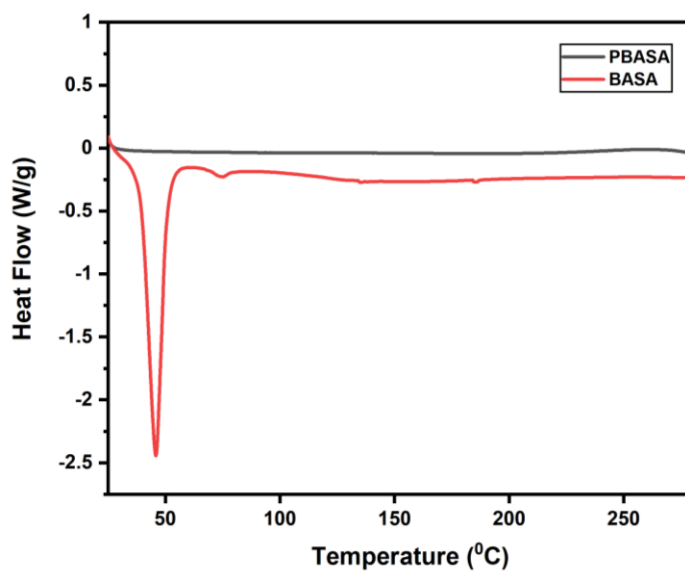

Figure S2. DSC comparison of BASA and PBASA.

**Table S1.** Estimation of activation energy ( $E_a$ ) for the benzoxazine curing using the Ozawa method

| VBI                                                                                                                                                                                                                                                       | HBI                                                                                                                                                                                                                                                       |
|-----------------------------------------------------------------------------------------------------------------------------------------------------------------------------------------------------------------------------------------------------------|-----------------------------------------------------------------------------------------------------------------------------------------------------------------------------------------------------------------------------------------------------------|
| $Y = -15.45x - 32.11$ ( $R^2 = 0.99$ )<br>$\ln(\beta) = -1.052E_a/RT_p + C$<br>$-15.45x = -1.052E_a/RT_p$ ( $R = 8.314 \text{ J mol}^{-1} \text{ K}^{-1}$ )<br>$E_a/R = 15.45/1.052$<br>$E_a = 15.45 \cdot 8.314 / 1.052 = \mathbf{122.1 \text{ kJ/mol}}$ | $Y = -12.52x - 27.509$ ( $R^2 = 0.99$ )<br>$\ln(\beta) = -1.052E_a/RT_p + C$<br>$-12.52x = -1.052E_a/RT_p$ ( $R = 8.314 \text{ J mol}^{-1} \text{ K}^{-1}$ )<br>$E_a/R = 12.52/1.052$<br>$E_a = 12.52 \cdot 8.314 / 1.052 = \mathbf{98.9 \text{ kJ/mol}}$ |

**Table S2.** Calculation of activation energy ( $E_a$ ) using stress relaxation studies

| PVBI                                                                                                                                                                                                                                                                                                  | PHBI                                                                                                                                                                                                                                                                                                       |
|-------------------------------------------------------------------------------------------------------------------------------------------------------------------------------------------------------------------------------------------------------------------------------------------------------|------------------------------------------------------------------------------------------------------------------------------------------------------------------------------------------------------------------------------------------------------------------------------------------------------------|
| $Y = 6.23x - 14.79$ ( $R^2 = 0.992$ )<br>$\ln(T^*) = 6.18 \cdot 1000/T - 14.7$<br>$\tau^* = \tau_0 \exp(E_a/RT)$ ( $R = 8.314 \text{ J mol}^{-1} \text{ K}^{-1}$ )<br>$\ln(\tau^*) = \ln(\tau_0) + E_a/RT$<br>$E_a/R = 6.18 \cdot 1000$<br>$E_a = 6.18 \cdot 1000 \cdot 8.314 = 51.38 \text{ kJ/mol}$ | $Y = 8.284x - 15.66$ ( $R^2 = 0.999$ )<br>$\ln(T^*) = 8.28 \cdot 1000/T - 15.66$<br>$\tau^* = \tau_0 \exp(E_a/RT)$ ( $R = 8.314 \text{ J mol}^{-1} \text{ K}^{-1}$ )<br>$\ln(\tau^*) = \ln(\tau_0) + E_a/RT$<br>$E_a/R = 8.284 \cdot 1000$<br>$E_a = 8.284 \cdot 1000 \cdot 8.314 = 68.873 \text{ kJ/mol}$ |

### S3. Calculation of crosslink density

#### PHBI

$$\nu = \frac{E'}{3RT} = \frac{46.29 \times 10^6}{3 \times 8.314 \times 383.23} = 4842.2 \text{ mol/m}^3$$

#### PVBI

$$\nu = \frac{E'}{3RT} = \frac{3.960 \times 10^6}{3 \times 8.314 \times 383.23} = 414.2 \text{ mol/m}^3$$

Where  $\nu$  is crosslink density,  $E'$  is storage modulus determined from the rubbery plateau,  $R$  is universal gas constant and  $T$  is the temperature at which the modulus is taken.

#### 4. Swelling studies

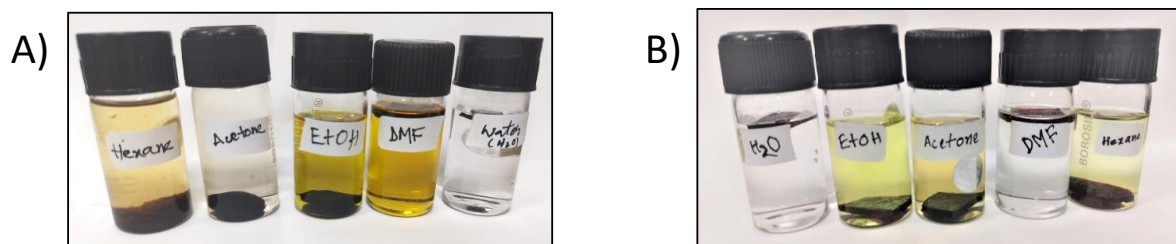

**Figure S3.** Photographs of cured polybenzoxazine in different solvents kept for one-week (A) PVBI, and (B) PHBI.

**Table S3.** Swelling ratio for cured polybenzoxazine in different solvents kept for one-week.

| Solvent | PVBI  | PHBI  |
|---------|-------|-------|
| Hexane  | 35.63 | 4.07  |
| Acetone | 34.64 | 14.97 |
| Ethanol | 13.51 | 3.94  |
| DMF     | 15.23 | 2.85  |
| Water   | 0.57  | 0.36  |

#### 5. Contact angle Analysis

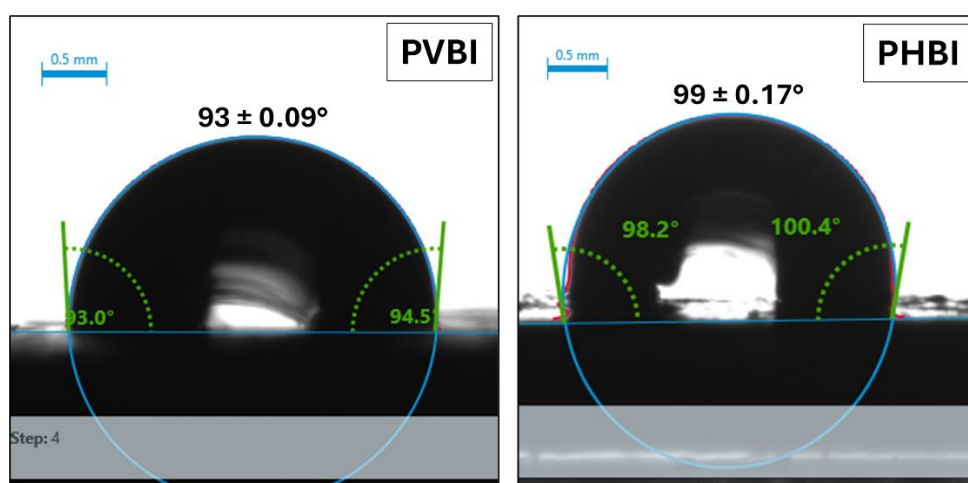

**Figure S4.** Contact angle analysis performed on PVBI and PHBI.

## 6. FTIR of Pristine and Recycled PVBI

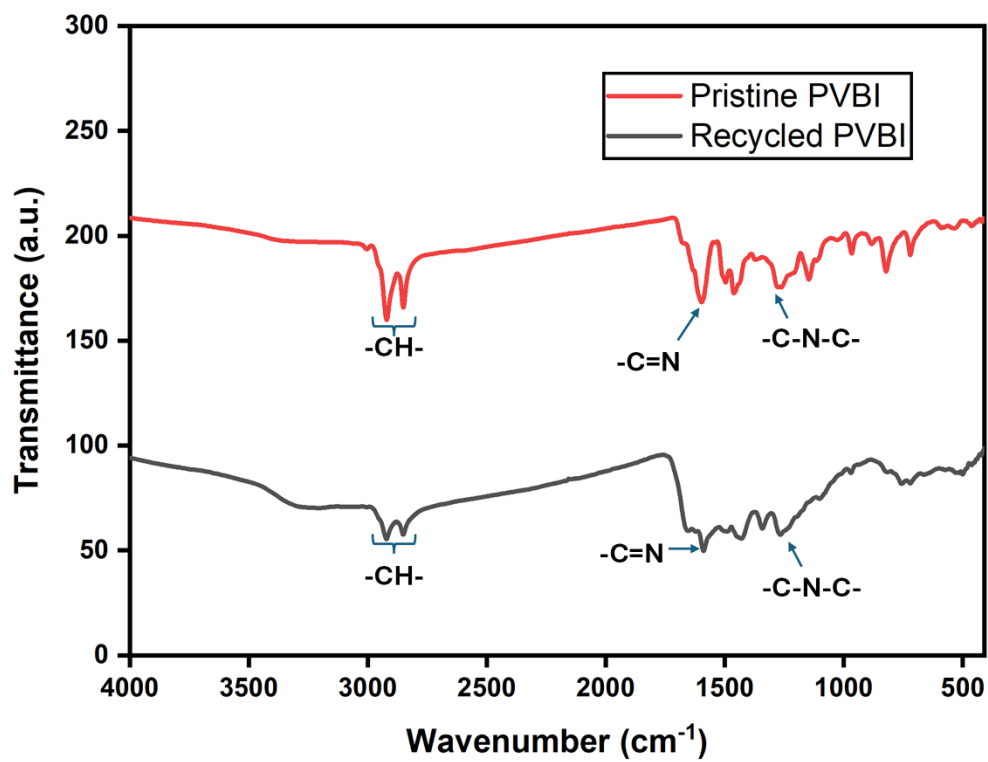

Figure S5. FTIR comparison of pristine sample and recycled sample.
